# Supplementary material for: Integrated tumor tissue metabolomic and transcriptomic approaches for identifying diagnostic biomarkers in endometrial cancer with diabetes mellitus
Source: Research Square preprint supplement (doi:10.21203/rs.3.rs-8035766/v1), 2026-01-16
Supplement: Supplementary file 2 [file 945d96b70a2988a6f363dd17.xlsx]

## Sheet: Table S1
Table S1. The inclusion and exclusion criteria of EC patients.
Inclusion criteria
l Patients who underwent primary surgical treatment at Tianjin Central Hospital of Obstetrics and Gynecology and were postoperatively confirmed to have primary endometrial carcinoma (EC) by histopathology.
l Availability of complete clinical and pathological data, including: age, menopausal status, serum CA125 level, tumor size, depth of myometrial invasion, histological grade, semi-quantitative assessment of estrogen receptor (ER) and progesterone receptor (PR), lymphovascular space invasion (LVSI), surgical pathological stage, lymph node metastasis, peritoneal cytology results, and details of pos…
l Completion of postoperative follow-up.
Exclusion criteria
l Presence of other concurrent systemic malignant tumors.
l Metastatic carcinoma secondary to primary malignancies in other organs.
l Patients who did not undergo surgical treatment.
l Patients whose initial treatment consisted of chemotherapy, radiotherapy, or endocrine therapy.

## Sheet: Table S2
Table S2: Top 30 up and down regulated genes in patients with EC-NDM vs EC-DM.
Gene ID	Annotation	P-value	log2FC
SPRR2D	small proline rich protein 2D	2.13555e-17	15.7814
TGM6	transglutaminase 6	1.08283e-16	14.0821
IVL	involucrin	2.10833e-16	13.9278
SPRR2A	small proline rich protein 2A	5.54159e-16	15.7408
VAX1	ventral anterior homeobox 1	5.64175e-16	11.9798
CASP14	caspase 14	9.38688e-16	12.7083
SPINK6	serine peptidase inhibitor Kazal type 6	1.34537e-15	15.1053
VSTM2B	V-set and transmembrane domain containing 2B	1.61417e-15	13.1071
LINC01980	long intergenic non-protein coding RNA 1980	2.0672e-15	11.6135
PRSS50	serine protease 50	3.69151e-15	13.4898
IGKV2D-40	immunoglobulin kappa variable 2D-40	4.16487e-15	15.2287
UGT1A8	UDP glucuronosyltransferase family 1 member A8	6.75981e-15	12.5343
SPINK7	serine peptidase inhibitor Kazal type 7	8.29304e-15	13.1603
KRT85	keratin 85	1.18024e-14	12.0508
IGHV1-69-2	immunoglobulin heavy variable 1-69-2	1.80791e-14	14.718
UGT1A9	UDP glucuronosyltransferase family 1 member A9	1.91945e-14	12.3169
TBX5-AS1	TBX5 antisense RNA 1	2.0013e-14	10.0361
PRR9	proline rich 9	2.06425e-14	12.9762
DSG1	desmoglein 1	2.57126e-14	9.36519
NOVA1-DT	NOVA1 divergent transcript	2.73806e-14	10.3043
CLDN19	claudin 19	2.7633e-14	10.8958
FAM90A28P	family with sequence similarity 90 member A28, pseudogene	2.95422e-14	12.2364
CRCT1	cysteine rich C-terminal 1	3.25654e-14	13.0933
CPN1	carboxypeptidase N subunit 1	3.73833e-14	11.6404
LHX8	LIM homeobox 8	4.95926e-14	10.8327
ZFP42	ZFP42 zinc finger protein	6.10304e-14	11.3055
MT4	metallothionein 4	6.36207e-14	14.7109
TMPRSS11B	transmembrane serine protease 11B	6.69125e-14	11.0491
NPEPPSP1	NPEPPS pseudogene 1	7.51129e-14	13.2674
SPRR2F	small proline rich protein 2F	1.18657e-13	13.967
PASD1	PAS domain containing repressor 1	1.91655e-18	-14.2701
KRT20	keratin 20	3.27695e-18	-14.8312
BLOC1S5-TXNDC5	BLOC1S5-TXNDC5 readthrough (NMD candidate)	2.15975e-17	-13.4755
MAGEA3	MAGE family member A3	2.16616e-17	-14.8022
CT45A8	cancer/testis antigen family 45 member A8	5.59065e-16	-12.5804
GAGE1	G antigen 1	7.39173e-16	-12.413
FOXR2	forkhead box R2	1.20689e-15	-12.1096
LINC01087	long intergenic non-protein coding RNA 1087	3.42584e-15	-11.6469
REG3A	regenerating family member 3 alpha	8.49416e-15	-12.0937
TMEM132D-AS1	TMEM132D antisense RNA 1	1.28904e-14	-11.9496
LINC01524	long intergenic non-protein coding RNA 1524	1.29031e-14	-8.97725
MUC17	mucin 17, cell surface associated	4.54895e-14	-8.17927
PSG9	pregnancy specific beta-1-glycoprotein 9	7.84147e-14	-8.894
LINC02780	long intergenic non-protein coding RNA 2780	2.84094e-13	-10.7524
GAGE12H	G antigen 12H	3.91854e-13	-12.3563
CCT6P4	chaperonin containing TCP1 subunit 6 pseudogene 4	4.47232e-13	-10.9048
MAGEA6-DT	MAGEA6 divergent transcript	9.41119e-13	-11.1811
CT45A3	cancer/testis antigen family 45 member A3	1.20726e-12	-11.875
VN1R54P	vomeronasal 1 receptor 54 pseudogene	1.34368e-12	-10.903
PNMA5	PNMA family member 5	1.75415e-06	-9.64375
FNDC1-AS1	FNDC1 antisense RNA 1	1.86448e-06	-11.7278
RSC1A1	regulator of solute carriers 1	1.44935e-05	-2.74209
LINC02899	long intergenic non-protein coding RNA 2899	2.0056e-05	-12.2483
FNDC1	fibronectin type III domain containing 1	2.05016e-05	-2.0874
FLJ16779	uncharacterized LOC100192386	2.1395e-05	-5.58056
KLK1	kallikrein 1	2.81628e-05	-5.4592
LGALS4	galectin 4	4.94577e-05	-4.78158
ODAM	odontogenic, ameloblast associated	5.09951e-05	-5.959
SPINK1	serine peptidase inhibitor Kazal type 1	6.43741e-05	-5.90378
B3GALT5-AS1	B3GALT5 antisense RNA 1	7.90683e-05	-3.0105

## Sheet: Table S3
Table S3: Differentially expressed gene (DEG) lists for major enriched pathways
Monocarboxylic acid metabolic process						Terpenoid metabolic process						Renin-angiotensin system
Gene	EC-NDM	EC-DM	FC	pvalue		Gene	EC-NDM	EC-DM	FC	pvalue		Gene	EC-NDM	EC-DM	FC	pvalue
ALDH1L1	0.43656	1.26542	2.8986	0.027041		ALDH1L1	0.43656	1.26542	2.8986	0.027041		ABCC4	2.83862	1.4059	0.495277	0.0245498
CYP4F8	0.0001	0.0167471	167.471	0.0153859		CYP4F8	0.0001	0.0167471	167.471	0.0153859		AGT	1.19649	0.343465	0.287062	0.0187558
OSBPL6	0.110057	0.708578	6.43826	0.000321134		OSBPL6	0.110057	0.708578	6.43826	0.000321134		AGTR2	0.969777	0.127216	0.131181	0.0428388
ADH1B	1.05813	9.75588	9.21989	0.0407702		CLPS	0.0175821	1.09969	62.546	0.049997		F5	3.28653	0.167073	0.0508357	0.000703429
ACMSD	0.0391422	0.123641	3.15875	0.0120174		ADH1B	1.05813	9.75588	9.21989	0.0407702		NOX1	0.716505	0.11055	0.154291	0.00285646
CYP1A2	0.0001	0.0895603	895.603	0.00207867		ACMSD	0.0391422	0.123641	3.15875	0.0120174		FFAR3	0.100662	0.0143953	0.143006	0.0485325
CYP2B6	0.0112485	0.201677	17.9292	0.027637		ACVR1C	0.0454002	0.116943	2.57583	0.00538256		ANPEP	12.3013	1.02796	0.0835646	0.000157844
LDHAL6A	0.0223893	0.896984	40.0632	0.00203091		ADM	7.08	18.492	2.61187	0.025437		SOX8	0.54004	0.124519	0.230573	0.0203738
DBH	0.125714	0.531369	4.22681	0.0190562		CYP1A2	0.0001	0.0895603	895.603	0.00207867		IL6	1.55467	0.216192	0.13906	0.0101793
AKR1C1	0.282848	3.25884	11.5215	0.00140017		CYP2B6	0.0112485	0.201677	17.9292	0.027637		KCNC2	0.0642378	0.0001	0.00155672	0.00248564
AKR1C2	0.180709	4.16641	23.0559	2.60583e-05		LDHAL6A	0.0223893	0.896984	40.0632	0.00203091		KCNK3	1.24569	0.0723412	0.058073	0.000429814
SPTSSB	0.226763	0.71672	3.16065	0.0304221		DBH	0.125714	0.531369	4.22681	0.0190562		KLK1	19.3263	0.439304	0.0227309	2.81628e-05
IDO2	0.0738326	0.517585	7.01026	0.00633063		AKR1C1	0.282848	3.25884	11.5215	0.00140017		KLK2	0.586578	0.0710657	0.121153	0.0285247
DHCR24	8.35745	30.0795	3.59913	0.0338063		AKR1C2	0.180709	4.16641	23.0559	2.60583e-05		ASIC2	0.746449	0.0871158	0.116707	0.0215859
DTYMK	4.80731	9.6973	2.0172	0.0238702		SPTSSB	0.226763	0.71672	3.16065	0.0304221		DOK5	0.849281	0.260263	0.306451	0.0439866
EPHX1	37.3066	86.4177	2.31642	0.00236256		DHCR24	8.35745	30.0795	3.59913	0.0338063		REN	6.66564	0.765293	0.114812	0.000797816
ALOX12B	0.00831061	0.0927426	11.1595	0.044984		NQO1	8.42037	25.8162	3.06592	0.0375767		RET	0.603044	0.139073	0.230618	0.037251
PHGDH	2.86828	6.20839	2.1645	0.0412714		DIO1	0.0845722	0.513766	6.07489	0.00868428		BDKRB2	1.81771	0.738795	0.406442	0.0477973
GSTA1	0.523742	8.49053	16.2113	0.00856708		EPHX1	37.3066	86.4177	2.31642	0.00236256		SCN2A	0.131538	0.0423997	0.322338	0.0421372
HMGCS2	0.114082	3.92508	34.4058	0.00581029		FOXE1	0.0017555	0.09191	52.3555	0.00507505		SCN5A	0.516787	0.132285	0.255976	0.015186
CYP26C1	0.00555796	0.0569875	10.2533	0.0104077		NMNAT2	0.242969	0.698022	2.87288	0.0184503		SLC1A2	0.231276	0.0803129	0.347261	0.049442
IDO1	3.4838	9.94621	2.85499	0.0375667		ABCA4	0.103632	0.29298	2.82711	0.0268538		SLC2A3	9.70566	2.55826	0.263584	0.0127769
ASPG	0.10986	0.342671	3.11915	0.0248218		GK5	1.97761	4.30597	2.17736	0.0326882		SPINK1	17.3077	0.289085	0.0167027	6.43741e-05
IYD	0.0204006	0.419181	20.5474	0.00835703		GALR1	0.000974873	0.0925885	94.975	0.0205914		ADAM12	4.26985	0.563916	0.132069	0.0100595
CYP4F3	0.0195393	0.280097	14.3351	5.84728e-05		GC	0.0001	0.049275	492.75	0.0289102		SLC4A4	1.74252	0.387931	0.222627	0.00396408
PRKAG2	0.900186	1.9116	2.12356	0.00223932		GCHFR	1.53633	6.0162	3.91595	0.0100919		CACNA1G	0.875895	0.115784	0.13219	0.020638
ATP6V1B1	1.07744	4.56308	4.23511	0.0153417		GSTA1	0.523742	8.49053	16.2113	0.00856708
UGT1A8	0.0001	0.593215	5932.15	6.75981e-15		HMGCS2	0.114082	3.92508	34.4058	0.00581029
UGT1A9	0.0001	0.510213	5102.13	1.91945e-14		AOX1	0.377634	1.50351	3.98139	0.0442541
PPARG	0.223691	0.501584	2.24231	0.0141065		CYP26C1	0.00555796	0.0569875	10.2533	0.0104077
ACSM5	0.0526565	0.218197	4.14379	0.00727774		KCNK2	0.0195872	0.170912	8.72571	0.00965584
DHFRP1	2.62828	5.37119	2.04361	0.040183		IYD	0.0204006	0.419181	20.5474	0.00835703
CYP4F11	0.257824	2.72369	10.5641	7.16151e-05		CYP4F3	0.0195393	0.280097	14.3351	5.84728e-05
TPH1	0.234011	1.79242	7.65955	0.00289661		AKR1B15	0.00229092	0.277771	121.249	5.97651e-06
UGDH	6.8618	13.83	2.01551	0.00372083		NKX3-1	0.355207	0.898524	2.52958	0.0111275
UGT2B4	0.0001	0.0795987	795.987	0.00487694		OPRK1	0.00108181	0.313793	290.063	7.22903e-09
ELOVL3	0.0157215	0.174797	11.1183	0.00743052		GAL	0.084225	1.1715	13.9091	0.0193845
ABHD1	0.112316	0.303892	2.70568	0.0416791		PRKAG2	0.900186	1.9116	2.12356	0.00223932
AKR1C3	2.5627	11.6223	4.53519	0.0078601		ENPP3	0.594386	7.42793	12.4968	0.00101287
						ATP6V1B1	1.07744	4.56308	4.23511	0.0153417
						POMC	0.084717	1.45969	17.2302	0.00207738
						UGT1A8	0.0001	0.593215	5932.15	6.75981e-15
						UGT1A9	0.0001	0.510213	5102.13	1.91945e-14
						PPARG	0.223691	0.501584	2.24231	0.0141065
						AKR1B10	0.190394	24.3145	127.706	2.89849e-06
						DHFRP1	2.62828	5.37119	2.04361	0.040183
						ACE2	0.0725706	0.169823	2.34011	0.0387338
						RBP2	0.0592948	1.01014	17.0359	0.0233843
						CPLX3	0.141177	2.37784	16.843	0.0399948
						SOX11	0.002289	0.0219485	9.58869	0.0160821
						SULT1E1	0.0193947	0.233047	12.0161	0.0203377
						TPH1	0.234011	1.79242	7.65955	0.00289661
						UGT2B4	0.0001	0.0795987	795.987	0.00487694
						RAB11FIP1	3.67227	8.03198	2.1872	0.0373102
						PDE8B	0.0001	0.0405393	405.393	0.0456641
						AKR1C3	2.5627	11.6223	4.53519	0.0078601
						RASL10B	0.597018	1.20829	2.02387	0.0268176
						RIMS2	0.0453343	0.634218	13.9898	0.00112578

## Sheet: Table S4
Table S4. A total of 95 genes associated with the metabolic pathways, including the monocarboxylic acid metabolic process, terpenoid metabolic process, and the renin–angiotensin system. Related to Fig. 4C-4D, and Fig. S3-S4.
ALDH1L1	HMGCS2	AKR1C3	SCN2A	GCHFR
CYP4F8	CYP26C1	ABCC4	SCN5A	AOX1
OSBPL6	IDO1	AGT	SLC1A2	KCNK2
ADH1B	ASPG	AGTR2	SLC2A3	AKR1B15
ACMSD	IYD	F5	SPINK1	NKX3-1
CYP1A2	CYP4F3	NOX1	ADAM12	OPRK1
CYP2B6	PRKAG2	FFAR3	SLC4A4	GAL
LDHAL6A	ATP6V1B1	ANPEP	CACNA1G	ENPP3
DBH	UGT1A8	SOX8	CLPS	POMC
AKR1C1	UGT1A9	IL6	ACVR1C	AKR1B10
AKR1C2	PPARG	KCNC2	ADM	ACE2
SPTSSB	ACSM5	KCNK3	NQO1	RBP2
IDO2	DHFRP1	KLK1	DIO1	CPLX3
DHCR24	CYP4F11	KLK2	FOXE1	SOX11
DTYMK	TPH1	ASIC2	NMNAT2	SULT1E1
EPHX1	UGDH	DOK5	ABCA4	RAB11FIP1
ALOX12B	UGT2B4	REN	GK5	PDE8B
PHGDH	ELOVL3	RET	GALR1	RASL10B
GSTA1	ABHD1	BDKRB2	GC	RIMS2

## Sheet: Table S5
Table S5: Differentially expressed genes (DEGs) identified by the gene-metabolite interaction network (Figure 5)
Gene	Gene name	Function	Metabolic pathway(s)	Transcriptomic pathway(s)	Log2FC	P-value
RNASE1	Ribonuclease A family member 1, pancreatic	This gene encodes a member of the pancreatic-type of secretory ribonucleases, a subset of the ribonuclease A superfamily. The encoded endonuclease cleaves internal phosphodiester RNA bonds on the 3'-side of pyrimidine bases. It prefers poly(C) as a substrate and hydrolyzes 2',3'-cyclic nucleotides, with a pH optimum near 8.0. The encoded protein is monomeric and more commonly acts to degrade ds-R…	Enzymes Messenger RNA biogenesis Membrane trafficking	Developmental cell lineages Humoral immune response Cell-cell adhesion via plasma-membrane adhesion molecules Differentiation of keratinocytes in interfollicular epidermis Defense response to Gram-positive bacterium	1.65125	0.0205923
LDHAL6A	Lactate dehydrogenase A like 6A	Enables L-lactate dehydrogenase activity. Predicted to be involved in lactate metabolic process. Located in cytoplasm. [provided by Alliance of Genome Resources, Apr 2025]	Glycolysis / Gluconeogenesis Cysteine and methionine metabolism Pyruvate metabolism Propanoate metabolism Metabolic pathways HIF-1 signaling pathway Glucagon signaling pathway Central carbon metabolism in cancer	Regulation of hormone levels Metapathway biotransformation phase I and II Terpenoid metabolic process; Monocarboxylic acid metabolic process	5.3242	0.00203091
AOX1	Aldehyde oxidase 1	Aldehyde oxidase produces hydrogen peroxide and, under certain conditions, can catalyze the formation of superoxide. Aldehyde oxidase is a candidate gene for amyotrophic lateral sclerosis. [provided by RefSeq, Jul 2008]	Valine, leucine and isoleucine degradation Tyrosine metabolism Tryptophan metabolism Vitamin B6 metabolism Nicotinate and nicotinamide metabolism Retinol metabolism Drug metabolism - cytochrome P450 Metabolic pathways JAK-STAT signaling pathway	Regulation of hormone levels Bile secretion Terpenoid metabolic process Xenobiotic metabolic process	1.99327	0.0442541
EGF	Epidermal growth factor	This gene encodes a member of the epidermal growth factor superfamily. The encoded preproprotein is proteolytically processed to generate the 53-amino acid epidermal growth factor peptide. This protein acts a potent mitogenic factor that plays an important role in the growth, proliferation and differentiation of numerous cell types. This protein acts by binding with high affinity to the cell surf…	EGFR tyrosine kinase inhibitor resistance MAPK signaling pathway ErbB signaling pathway Ras signaling pathway Rap1 signaling pathway Calcium signaling pathway HIF-1 signaling pathway FoxO signaling pathway Phospholipase D signaling pathway PI3K-Akt signaling pathway Focal adhesion Gap junction JAK-STAT signaling pathway Regulation of actin cytoskeleton Hepatitis C Human papillomavirus infection P…	Naba matrisome associated Developmental cell lineages Hallmark KRAS signaling DN Calcium ion binding Differentiation of keratinocytes in interfollicular epidermis Xenobiotic metabolic process	2.47386	0.0281664
GRIN2B	Glutamate ionotropic receptor NMDA type subunit 2B	This gene encodes a member of the N-methyl-D-aspartate (NMDA) receptor family within the ionotropic glutamate receptor superfamily. The encoded protein is a subunit of the NMDA receptor ion channel which acts as an agonist binding site for glutamate. The NMDA receptors mediate a slow calcium-permeable component of excitatory synaptic transmission in the central nervous system. The NMDA receptors …	Ras signaling pathway Rap1 signaling pathway Calcium signaling pathway cAMP signaling pathway Neuroactive ligand-receptor interaction Neuroactive ligand signaling Circadian entrainment Long-term potentiation Glutamatergic synapse Dopaminergic synapse Alzheimer disease Amyotrophic lateral sclerosis Huntington disease Spinocerebellar ataxia Prion disease Pathways of neurodegeneration - multiple dis…	Monocarboxylic acid binding Regulation of system process Peptide ligand-binding receptors	3.00252	0.0475184
IFNA1	Interferon alpha 1	This gene is a member of the alpha interferon gene cluster on chromosome 9. The encoded cytokine is a member of the type I interferon family that is produced in response to viral infection as a key part of the innate immune response with potent antiviral, antiproliferative and immunomodulatory properties. This cytokine, like other type I interferons, binds a plasma membrane receptor made of IFNAR…	Cytokine-cytokine receptor interaction PI3K-Akt signaling pathway Necroptosis Toll-like receptor signaling pathway NOD-like receptor signaling pathway RIG-I-like receptor signaling pathway Cytosolic DNA-sensing pathway JAK-STAT signaling pathway Natural killer cell mediated cytotoxicity Alcoholic liver disease Tuberculosis Hepatitis C Hepatitis B Measles Human cytomegalovirus infection Influenza …	Naba matrisome associated Humoral immune response Antigen binding Adaptive immune response	7.94158	0.0197672
CHRM2	Cholinergic receptor muscarinic 2	The muscarinic cholinergic receptors belong to a larger family of G protein-coupled receptors. The functional diversity of these receptors is defined by the binding of acetylcholine to these receptors and includes cellular responses such as adenylate cyclase inhibition, phosphoinositide degeneration, and potassium channel mediation. Muscarinic receptors influence many effects of acetylcholine in …	Calcium signaling pathway cAMP signaling pathway Neuroactive ligand-receptor interaction Neuroactive ligand signaling PI3K-Akt signaling pathway Cholinergic synapse Regulation of actin cytoskeleton	Regulation of system process Peptide ligand-binding receptors Chemical synaptic transmission	-4.147	0.00042363
SLC22A6	Solute carrier family 22 member 6	The protein encoded by this gene is involved in the sodium-dependent transport and excretion of organic anions, some of which are potentially toxic. The encoded protein is an integral membrane protein and may be localized to the basolateral membrane. Four transcript variants encoding four different isoforms have been found for this gene. [provided by RefSeq, Jul 2008]	Folate transport and metabolism	Defense response to Grampositive bacterium RNA nuclease activity Defense response to virus Nucleic acid binding Nuclease activity Endonuclease activity Ribonuclease A activity Protein binding Hydrolase activity Lyase activity Extracellular region Extracellular exosome	10.0066	2.95586e-12
LYZ	Lysozyme	This gene encodes human lysozyme, whose natural substrate is the bacterial cell wall peptidoglycan (cleaving the beta[1-4]glycosidic linkages between N-acetylmuramic acid and N-acetylglucosamine). Lysozyme is one of the antimicrobial agents found in human milk, and is also present in spleen, lung, kidney, white blood cells, plasma, saliva, and tears. The protein has antibacterial activity against…	Salivary secretion	Humoral immune response Pancreatic cancer subtypes Antimicrobial peptides	-2.8211	0.0172635
P2RY14	Purinergic receptor P2Y14	The product of this gene belongs to the family of G-protein coupled receptors, which contains several receptor subtypes with different pharmacological selectivity for various adenosine and uridine nucleotides. This receptor is a P2Y purinergic receptor for UDP-glucose and other UDP-sugars coupled to G-proteins. It has been implicated in extending the known immune system functions of P2Y receptors…	Neuroactive ligand-receptor interaction Neuroactive ligand signaling	Peptide ligand-binding receptors	-2.09104	0.0481244
ABCB1	ATP binding cassette subfamily B member 1	The membrane-associated protein encoded by this gene is a member of the superfamily of ATP-binding cassette (ABC) transporters. ABC proteins transport various molecules across extra- and intra-cellular membranes. ABC genes are divided into seven distinct subfamilies (ABC1, MDR/TAP, MRP, ALD, OABP, GCN20, White). This protein is a member of the MDR/TAP subfamily. Members of the MDR/TAP subfamily a…	ABC transporters Bile secretion MicroRNAs in cancer Gastric cancer	Bile secretion Regulation of system process Xenobiotic metabolic process Vitamin D receptor pathway	2.70597	0.0153497
PENK	Proenkephalin	This gene encodes a preproprotein that is proteolytically processed to generate multiple protein products. These products include the pentapeptide opioids Met-enkephalin and Leu-enkephalin, which are stored in synaptic vesicles, then released into the synapse where they bind to mu- and delta-opioid receptors to modulate the perception of pain. Other non-opioid cleavage products may function in di…	Neuroactive ligand-receptor interaction Hormone signaling Neuroactive ligand signaling	Naba matrisome associated Humoral immune response Peptide ligand-binding receptors Growth factor activity Regulation of IGF transport and uptake by IGFBPs Chemical synaptic transmission Glial cell fate commitment	-4.30476	0.0389441
PHGDH	Phosphoglycerate dehydrogenase	This gene encodes the enzyme which is involved in the early steps of L-serine synthesis in animal cells. L-serine is required for D-serine and other amino acid synthesis. The enzyme requires NAD/NADH as a cofactor and forms homotetramers for activity. Mutations in this gene have been found in a family with congenital microcephaly, psychomotor retardation and other symptoms. Multiple alternatively…	Glycine, serine and threonine metabolism Cysteine and methionine metabolism Metabolic pathways Carbon metabolism Biosynthesis of amino acids	Regulation of hormone levels Metapathway biotransformation phase I and II Proximal/distal pattern formation Anterior/posterior pattern specification Monocarboxylic acid metabolic process	1.11403	0.0412714
IL6	Interleukin 6	This gene encodes a cytokine that functions in inflammation and the maturation of B cells. In addition, the encoded protein has been shown to be an endogenous pyrogen capable of inducing fever in people with autoimmune diseases or infections. The protein is primarily produced at sites of acute and chronic inflammation, where it is secreted into the serum and induces a transcriptional inflammatory…	EGFR tyrosine kinase inhibitor resistance Antifolate resistance Cytokine-cytokine receptor interaction Viral protein interaction with cytokine and cytokine receptor HIF-1 signaling pathway FoxO signaling pathway PI3K-Akt signaling pathway Cellular senescence Toll-like receptor signaling pathway NOD-like receptor signaling pathway Cytosolic DNA-sensing pathway C-type lectin receptor signaling path…	Naba matrisome associated Humoral immune response Antigen binding Regulation of hormone levels Renin-angiotensin system Bile secretion Organ or tissue specific immune response Growth factor activity Regulation of IGF transport and uptake by IGFBPs Antimicrobial peptides; Regeneration Glial cell fate commitment	-2.84623	0.0101793
PPARG	Peroxisome proliferator activated receptor gamma	This gene encodes a member of the peroxisome proliferator-activated receptor (PPAR) subfamily of nuclear receptors. PPARs form heterodimers with retinoid X receptors (RXRs) and these heterodimers regulate transcription of various genes. Three subtypes of PPARs are known: PPAR-alpha, PPAR-delta, and PPAR-gamma. The protein encoded by this gene is PPAR-gamma and is a regulator of adipocyte differen…	PPAR signaling pathway Efferocytosis AMPK signaling pathway Longevity regulating pathway Osteoclast differentiation Thermogenesis Non-alcoholic fatty liver disease Huntington disease Pathways in cancer Transcriptional misregulation in cancer Thyroid cancer Lipid and atherosclerosis	Formation of the cornified envelope Regulation of hormone levels Monocarboxylic acid binding Regulation of system process Metapathway biotransformation phase I and II Olefinic compound metabolic process Terpenoid metabolic process Monocarboxylic acid metabolic process	1.16499	0.0141065
ABCC4	ATP binding cassette subfamily C member 4 (PEL blood group)	The protein encoded by this gene is a member of the superfamily of ATP-binding cassette (ABC) transporters. ABC proteins transport various molecules across extra- and intra-cellular membranes. ABC genes are divided into seven distinct subfamilies (ABC1, MDR/TAP, MRP, ALD, OABP, GCN20, White). This protein is a member of the MRP subfamily which is involved in multi-drug resistance. This family mem…	Antifolate resistance ABC transporters cAMP signaling pathway Bile secretion Folate transport and metabolism	Regulation of hormone levels Bile secretion Regulation of system process Renin-angiotensin system Sodium ion transmembrane transporter activity Bile acid and bile salt transport	-1.01369	0.0245498
SERPINA1	Serpin family A member 1	The protein encoded by this gene is a serine protease inhibitor belonging to the serpin superfamily whose targets include elastase, plasmin, thrombin, trypsin, chymotrypsin, and plasminogen activator. This protein is produced in the liver, the bone marrow, by lymphocytic and monocytic cells in lymphoid tissue, and by the Paneth cells of the gut. Defects in this gene are associated with chronic ob…	Complement and coagulation cascades	Naba matrisome associated Serine-type endopeptidase inhibitor activity Growth factor activity Regulation of IGF transport and uptake by IGFBPs	-2.70046	0.012427
